# Supplementary material for: Outbreak of Porcine Reproductive and Respiratory Syndrome Virus 1 in Taiwan
Source: PubMed Central journal article supplement (PMC7150920; doi:10.3390/v12030316), 2020-03-16
Supplement: viruses-12-00316-s001.pdf [file viruses-12-00316-s001.pdf]

|            |    | Percent Identity |      |      |      |      |      |      |      |      |      |      |      |      |      |    |                   |
|------------|----|------------------|------|------|------|------|------|------|------|------|------|------|------|------|------|----|-------------------|
|            |    | 1                | 2    | 3    | 4    | 5    | 6    | 7    | 8    | 9    | 10   | 11   | 12   | 13   | 14   |    |                   |
| Divergence | 1  | █                | 98.2 | 94.1 | 87.4 | 93.8 | 80.2 | 56.1 | 57.9 | 57.8 | 57.0 | 57.5 | 57.3 | 57.8 | 91.7 | 1  | NPUST-2789-3W-2   |
|            | 2  | 1.8              | █    | 95.1 | 87.9 | 94.8 | 80.6 | 56.4 | 58.0 | 58.0 | 57.2 | 57.6 | 57.3 | 57.8 | 92.6 | 2  | Amervac-PRRS      |
|            | 3  | 6.5              | 5.2  | █    | 88.6 | 98.9 | 80.5 | 56.2 | 57.8 | 57.6 | 56.8 | 57.5 | 57.2 | 57.6 | 91.8 | 3  | Lelystad-virus    |
|            | 4  | 12.9             | 12.3 | 11.3 | █    | 88.3 | 79.4 | 56.8 | 58.7 | 57.4 | 57.4 | 57.3 | 56.8 | 58.2 | 85.7 | 4  | Ingelvac-PRRSFLEX |
|            | 5  | 6.6              | 5.4  | 1.0  | 11.5 | █    | 80.3 | 56.1 | 57.6 | 57.6 | 56.8 | 57.7 | 57.3 | 57.5 | 91.5 | 5  | Porcilis-PRRS     |
|            | 6  | 24.1             | 23.7 | 23.6 | 24.9 | 23.8 | █    | 55.8 | 58.0 | 57.3 | 56.6 | 57.1 | 56.9 | 58.0 | 79.4 | 6  | Lena              |
|            | 7  | 58.7             | 58.3 | 58.5 | 57.8 | 58.6 | 58.9 | █    | 81.9 | 87.0 | 88.4 | 85.8 | 84.0 | 79.1 | 56.0 | 7  | MD001             |
|            | 8  | 57.8             | 57.7 | 58.2 | 57.6 | 58.2 | 58.4 | 15.8 | █    | 84.9 | 83.4 | 83.8 | 82.5 | 88.1 | 57.7 | 8  | MN184             |
|            | 9  | 58.1             | 57.9 | 58.5 | 57.9 | 58.3 | 58.4 | 12.0 | 14.9 | █    | 98.1 | 91.2 | 89.0 | 82.0 | 57.5 | 9  | Ingelvac-MLV      |
|            | 10 | 58.1             | 57.8 | 58.5 | 57.6 | 58.3 | 58.2 | 12.1 | 15.2 | 0.5  | █    | 89.6 | 87.5 | 80.7 | 56.7 | 10 | VR2332            |
|            | 11 | 58.5             | 58.1 | 58.6 | 57.6 | 58.4 | 58.5 | 13.0 | 16.0 | 9.2  | 9.5  | █    | 91.7 | 81.8 | 57.4 | 11 | Fostera-PRRS      |
|            | 12 | 58.7             | 58.6 | 59.1 | 58.5 | 58.8 | 58.6 | 15.0 | 17.2 | 11.5 | 11.8 | 8.1  | █    | 80.7 | 56.9 | 12 | JXA1              |
|            | 13 | 58.2             | 57.9 | 58.6 | 58.6 | 58.7 | 57.9 | 19.9 | 13.8 | 18.7 | 18.9 | 19.0 | 20.0 | █    | 57.3 | 13 | 107-844           |
|            | 14 | 9.1              | 8.1  | 9.0  | 15.1 | 9.1  | 25.4 | 59.2 | 58.3 | 59.0 | 58.9 | 58.6 | 59.4 | 59.1 | █    | 14 | HUN60077-16       |
|            | 1  | 2                | 3    | 4    | 5    | 6    | 7    | 8    | 9    | 10   | 11   | 12   | 13   | 14   |      |    |                   |

1

2

3

Figure S1. Nucleotide sequence identity of the complete genome of PRRSV/NPUST-2789-3W-2/TW/2018 with that of other PRRSVs.

|            |    | Percent Identity |      |      |      |      |      |      |      |      |      |      |      |      |      |      |      |      |    |                   |
|------------|----|------------------|------|------|------|------|------|------|------|------|------|------|------|------|------|------|------|------|----|-------------------|
|            |    | 1                | 2    | 3    | 4    | 5    | 6    | 7    | 8    | 9    | 10   | 11   | 12   | 13   | 14   | 15   | 16   | 17   |    |                   |
| Divergence | 1  | █                | 99.8 | 99.8 | 99.0 | 98.5 | 94.2 | 92.6 | 94.5 | 82.8 | 98.2 | 59.7 | 59.2 | 59.9 | 60.7 | 58.4 | 58.4 | 56.8 | 1  | NPUST-2789-3W-2   |
|            | 2  | 0.2              | █    | 99.7 | 98.9 | 98.4 | 94.0 | 92.4 | 94.3 | 82.7 | 98.1 | 59.9 | 59.4 | 60.0 | 60.8 | 58.6 | 58.3 | 57.0 | 2  | NPUST-2789-3W-5   |
|            | 3  | 0.2              | 0.3  | █    | 98.9 | 98.4 | 94.0 | 92.4 | 94.3 | 82.7 | 98.1 | 59.5 | 59.1 | 59.7 | 60.5 | 58.3 | 58.3 | 56.6 | 3  | NPUST-2860-S-6    |
|            | 4  | 1.0              | 1.2  | 1.2  | █    | 99.2 | 94.3 | 92.6 | 94.8 | 82.7 | 98.5 | 60.2 | 59.7 | 60.4 | 60.5 | 58.9 | 58.7 | 57.3 | 4  | Amervac-PRRS      |
|            | 5  | 1.5              | 1.7  | 1.7  | 0.8  | █    | 94.2 | 92.4 | 94.7 | 82.4 | 98.4 | 60.4 | 59.9 | 60.5 | 60.7 | 59.1 | 58.9 | 57.4 | 5  | Pyrsvac-183       |
|            | 6  | 6.3              | 6.5  | 6.5  | 6.1  | 6.3  | █    | 89.8 | 98.9 | 83.3 | 94.2 | 60.5 | 60.7 | 60.7 | 60.4 | 58.9 | 59.2 | 58.1 | 6  | Porcilis-PRRS     |
|            | 7  | 8.2              | 8.4  | 8.4  | 8.2  | 8.4  | 11.5 | █    | 90.6 | 82.8 | 92.4 | 60.2 | 60.4 | 60.4 | 61.3 | 60.7 | 59.5 | 58.6 | 7  | Ingelvac-PRRSFLEX |
|            | 8  | 5.9              | 6.1  | 6.1  | 5.5  | 5.7  | 1.2  | 10.5 | █    | 83.2 | 94.7 | 60.4 | 60.5 | 60.5 | 60.2 | 58.7 | 58.7 | 57.9 | 8  | Lelystad-virus    |
|            | 9  | 20.6             | 20.9 | 20.9 | 20.9 | 21.4 | 19.9 | 20.6 | 20.1 | █    | 82.7 | 59.1 | 58.3 | 59.5 | 58.7 | 57.8 | 57.6 | 58.3 | 9  | Lena              |
|            | 10 | 1.8              | 2.0  | 2.0  | 1.5  | 1.7  | 6.3  | 8.4  | 5.7  | 20.9 | █    | 59.5 | 59.1 | 59.7 | 60.2 | 58.3 | 58.1 | 56.6 | 10 | HUN60077-16       |
|            | 11 | 53.0             | 52.6 | 53.4 | 51.9 | 51.5 | 51.3 | 52.1 | 51.7 | 54.3 | 53.5 | █    | 91.6 | 99.4 | 89.2 | 86.9 | 87.1 | 88.0 | 11 | Ingelvac-MLV      |
|            | 12 | 54.0             | 53.6 | 54.4 | 52.9 | 52.5 | 50.8 | 51.6 | 51.2 | 56.4 | 54.5 | 9.3  | █    | 91.4 | 94.5 | 87.7 | 90.3 | 87.9 | 12 | Fostera-PRRS      |
|            | 13 | 52.6             | 52.2 | 53.0 | 51.5 | 51.2 | 50.9 | 51.7 | 51.3 | 53.2 | 53.2 | 0.7  | 9.5  | █    | 89.2 | 86.9 | 87.1 | 88.3 | 13 | VR2332            |
|            | 14 | 50.5             | 50.2 | 50.9 | 50.9 | 50.6 | 51.4 | 49.3 | 51.8 | 55.0 | 51.7 | 12.2 | 5.9  | 12.2 | █    | 87.5 | 88.5 | 87.1 | 14 | JXA1              |
|            | 15 | 56.1             | 55.7 | 56.6 | 55.0 | 54.6 | 55.2 | 51.0 | 55.6 | 57.8 | 56.6 | 15.3 | 14.2 | 15.3 | 14.3 | █    | 86.9 | 90.1 | 15 | MN184             |
|            | 16 | 56.1             | 56.6 | 56.6 | 55.4 | 55.0 | 54.4 | 53.7 | 55.6 | 57.9 | 57.2 | 15.0 | 10.9 | 15.0 | 13.1 | 15.2 | █    | 85.3 | 16 | MD001             |
|            | 17 | 60.2             | 59.8 | 60.7 | 59.0 | 58.6 | 57.1 | 55.9 | 57.5 | 56.4 | 60.7 | 13.8 | 14.0 | 13.3 | 15.0 | 11.2 | 17.5 | █    | 17 | 107-844           |
|            | 1  | 2                | 3    | 4    | 5    | 6    | 7    | 8    | 9    | 10   | 11   | 12   | 13   | 14   | 15   | 16   | 17   |      |    |                   |

4

5

6

7

Figure S2. Nucleotide sequence identity of ORF5 of PRRSV/NPUST-2789-3W-2/TW/2018 with that of other PRRSVs.
